# Supplementary material for: Combined System for the Simultaneous Delivery of Levofloxacin and Rifampicin: Structural and Functional Properties and Antibacterial Activity
Source: MDPI journal article supplement (doi:10.3390/jfb14070381), 2023-07-20
Supplement: s1 [file s1]

# Supplementary Materials: Combined System for the Simultaneous Delivery of Levofloxacin and Rifampicin: Structural and Functional Properties and Antibacterial Activity

Irina M. Le-Deygen \*, Polina V. Mamaeva, Anna A. Skuredina, Anastasia S. Safronova, Natalia G. Belogurova and Elena V. Kudryashova

Chemical Enzymology Department, Lomonosov Moscow State University, 119991 Moscow, Russia; mamaevapolina@yahoo.com (P.V.M.); skuredinanna@gmail.com (A.A.S.); milarika09@mail.ru (A.S.S.); nbelog@mail.ru (N.G.B.); helena\_koudriachova@hotmail.com (E.V.K.)

\* Correspondence: i.m.deygen@gmail.com

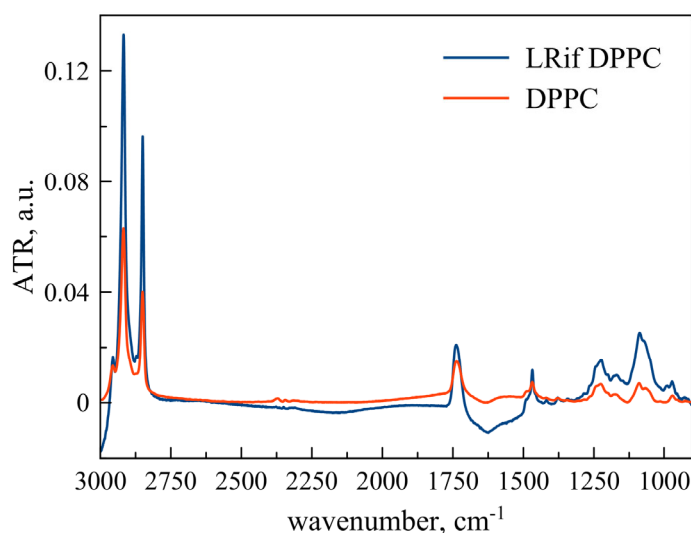

**Figure S1.** ATR-FTIR spectra of unloaded DPPC liposomes (red line) and DPPC liposomes containing Rif (blue line). Sodium phosphate buffer solution, pH = 7.4, T = 22 °C, lipid concentration 5 mg/mL.

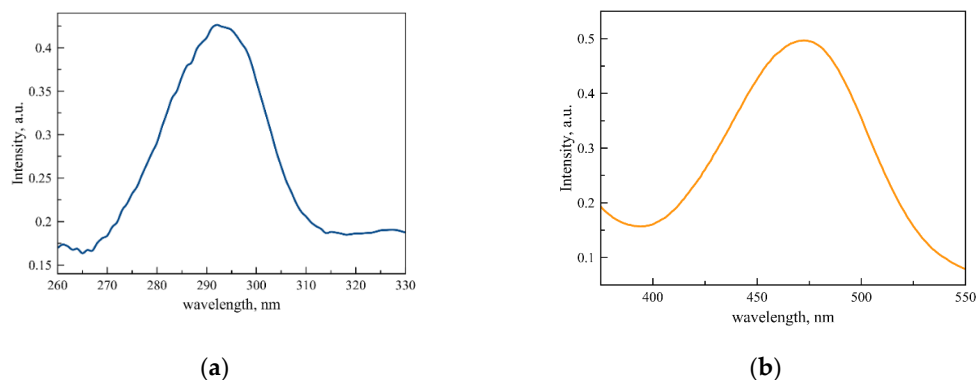

**Figure S2.** UV-VIS spectra of (a) levofloxacin 0.03 mM in 0.1 mM HCl solution (b) Rif 0.03 mM in sodium phosphate buffer solution, pH = 7.4, T = 22 °C.

**Table S1.** The values of the coefficient of determination  $R^2$  obtained by processing using various models of the release curves of liposomal preparations of Rif without a polymer shell and coated with a polymer, Lev in an unmodified  $\beta$ -cyclodextrin derivative and in the complex with  $\text{NH}_2$ -CD-Chit.

| System \ Model                                    | Zero Order | The First Order | Korsmeyer-Peppas Model | Hickson-Crowell Model | Higuchi Model |
|---------------------------------------------------|------------|-----------------|------------------------|-----------------------|---------------|
| LRif without polymer                              |            |                 |                        |                       |               |
| LRif DPPC                                         | 0.8649     | 0.8653          | 0.8952                 | 0.8572                | 0.9366        |
| LRif DPPC:CL 80:20                                | 0.8924     | 0.8928          | 0.9620                 | 0.8824                | 0.9606        |
| Mean $R^2$                                        | 0.8787     | 0.8791          | 0.9286                 | 0.8698                | <b>0.9470</b> |
| LRif in complex with chitosan-based polymer       |            |                 |                        |                       |               |
| LRif DPPC + HP-CD-Chit                            | 0.9801     | 0.9802          | 0.9954                 | 0.9420                | 0.9671        |
| LRif DPPC:CL 80:20 + HP-CD-Chit                   | 0.9407     | 0.9407          | 0.9712                 | 0.8860                | 0.9713        |
| LRif DPPC $\text{NH}_2$ -CD-Chit                  | 0.9569     | 0.9570          | 0.9570                 | 0.9307                | 0.9341        |
| LRif DPPC:CL 80:20 + $\text{NH}_2$ -CD-Chit       | 0.9719     | 0.9719          | 0.9829                 | 0.9231                | 0.9422        |
| LRif DPPC:CL 80:20 + $\text{NH}_2$ -CD-Chit + Lev | 0.9829     | 0.9829          | 0.9912                 | 0.8885                | 0.9566        |
| Mean $R^2$                                        | 0.9665     | 0.9665          | <b>0.9795</b>          | 0.9141                | 0.9543        |
| Lev – CD complex                                  |            |                 |                        |                       |               |
| Lev- $\text{NH}_2$ -CD                            | 0.7009     | 0.7019          | -                      | 0.6933                | <b>0.9192</b> |
| Lev – CD-Chit complex                             |            |                 |                        |                       |               |
| Lev- $\text{NH}_2$ -CD-Chit                       | 0.9355     | 0.9359          | 0.9850                 | 0.9185                | 0.9959        |
| LRif DPPC:CL 80:20 + $\text{NH}_2$ -CD-Chit + Lev | 0.9344     | 0.9347          | 0.9926                 | 0.9158                | 0.9952        |
| Mean $R^2$                                        | 0.9350     | 0.9353          | 0.9888                 | 0.9172                | <b>0.9956</b> |
